# Supplementary material for: Development of a multiplex qPCR assay for the simultaneous detection of Mycoplasma bovis, Mycoplasma species, and Acholeplasma laidlawii in milk
Source: PeerJ. 2021 Aug 12;9:e11881. doi: 10.7717/peerj.11881 (PMC8364749; doi:10.7717/peerj.11881)
Supplement: Supplemental Information 3 — Raw data files of singplex and multiplex assays, limit of detection determination in milk, and mixed-species qPCR detection [file peerj-09-11881-s003.xlsx]

## Sheet: Singleplex 
Singleplex qPCR assay
Senitivity of the single primer/probe set in detecting intended target species
Serial dilutions of purified M. bovis ATCC 25523 gDNA - 16S rRNA
gDNA Concentration (ng/µl)	fm/ul	femtograms	log value	rep 1	rep 1	rep 1	Mean Ct	STD
1	1000000	5000000	6.69897	14.1615	14.3159	14.1653	14.2142	0.088097
0.1	100000	500000	5.69897	17.5038	17.2974	17.5722	17.4578	0.143056
0.01	10000	50000	4.69897	20.9085	20.5451	20.6135	20.6891	0.193142
0.001	1000	5000	3.69897	24.4517	24.2903	24.0239	24.2553	0.216023
0.0001	100	500	2.69897	27.6961	27.5243	27.7564	27.6589	0.120385
1e-05	10	50	1.69897	31.3327	30.6812	30.9873	31.0004	0.325926
1e-06	1	5	0.69897	36.6203	36.0142	37.4455	36.6933	0.718423
Serial dilutions of purified M. bovigenitalium ATCC 19852 gDNA - 16S rRNA
gDNA Concentration (ng/µl)	fm/ul	femtograms	log value	rep 1	rep 1	rep 1	Mean Ct	STD
1	1000000	5000000	6.69897	13.7811	13.5681	13.5901	13.6464	0.117159
0.1	100000	500000	5.69897	16.2127	16.9776	16.6175	16.6026	0.382658
0.01	10000	50000	4.69897	19.6706	19.9812	19.8929	19.8482	0.16004
0.001	1000	5000	3.69897	22.9634	23.3026	23.4985	23.2548	0.270722
0.0001	100	500	2.69897	26.4456	26.8514	26.7245	26.6738	0.207593
1e-05	10	50	1.69897	29.7098	30.3655	30.3468	30.1407	0.373242
1e-06	1	5	0.69897	33.5019	33.1789	32.772	33.1509	0.365731
Serial dilutions of purified M. californicum ATCC 33461 gDNA - 16S rRNA
gDNA Concentration (ng/µl)	fm/ul	femtograms	log value	rep 1	rep 1	rep 1	Mean Ct	STD
1	1000000	5000000	6.69897	16.3417	15.2132	15.1767	15.5772	0.662322
0.1	100000	500000	5.69897	17.5536	18.1372	18.1971	17.9626	0.355495
0.01	10000	50000	4.69897	21.2228	21.1222	21.974	21.4397	0.465471
0.001	1000	5000	3.69897	24.5228	24.54	25.45	24.8376	0.530436
0.0001	100	500	2.69897	29.13	28.76	29.2	29.03	0.236432
1e-05	10	50	1.69897	32.53	31.85	32.23	32.2	0.340783
1e-06	1	5	0.69897	34.4465	34.6867	36.5542	35.2291	1.15382
Serial dilutions of purified M. bovis ATCC 25523 gDNA - rpoB
gDNA Concentration (ng/µl)	fm/ul	femtograms	log value	rep 1	rep 1	rep 1	Mean Ct	STD
1	1000000	5000000	6.69897	15.5305	15.4348	15.593	15.5194	0.0796978
0.1	100000	500000	5.69897	18.7715	18.5269	18.8573	18.7186	0.171423
0.01	10000	50000	4.69897	22.2153	22.5173	22.4445	22.3924	0.157631
0.001	1000	5000	3.69897	25.6054	26.1374	26.0027	25.9152	0.276592
0.0001	100	500	2.69897	29.1736	29.5324	29.5855	29.4305	0.22405
1e-05	10	50	1.69897	33.1919	33.8049	33.6217	33.5395	0.314659
1e-06	1	5	0.69897	35.245	41	36.5605	37.6019	3.01549
Serial dilutions of purified A. laidlawii ATCC 23206 gDNA - 16S-23S ITS
gDNA Concentration (ng/µl)	fm/ul	femtograms	log value	rep 1	rep 1	rep 1	Mean Ct	STD
1	1000000	5000000	6.69897	15.1789	15.1553	14.5824	14.9722	0.33779
0.1	100000	500000	5.69897	18.608	17.8222	17.3138	17.9147	0.652033
0.01	10000	50000	4.69897	21.2384	21.2955	21.0714	21.2018	0.116468
0.001	1000	5000	3.69897	25.0273	25.3422	24.937	25.1022	0.212705
0.0001	100	500	2.69897	29.0837	28.8188	29.0929	28.9984	0.155687
1e-05	10	50	1.69897	32.0456	32.257	31.5575	31.9533	0.358744
1e-06	1	5	0.69897	35.6719	35.9967	36.2632	35.9773	0.29613

## Sheet: Multiplex - 16S
Multiplex qPCR assay - 16S rRNA gene target
Senitivity of the primer/probe sets together in detecting intended target species
16S rRNA
Serial dilutions of purified M. bovis ATCC 25523 gDNA		5ul DNA template
gDNA Concentration (ng/µl)	fm/ul	femtograms	log value	rep 1	rep 1	rep 1	Mean Ct	STD
1	1000000	5000000	6.69897	13.8491	13.8204	13.7226	13.7974	0.0663544
0.1	100000	500000	5.69897	17.0376	17.478	17.3179	17.2778	0.222924
0.01	10000	50000	4.69897	20.3868	20.8168	20.4869	20.5635	0.225035
0.001	1000	5000	3.69897	23.8695	24.2187	24.2535	24.1139	0.212404
0.0001	100	500	2.69897	27.4645	27.3309	27.7804	27.5253	0.230803
1e-05	10	50	1.69897	30.8923	31.4222	30.9775	31.0973	0.284538
1e-06	1	5	0.69897	34.0186	33.8927	34.1238	34.0117	0.115703
Serial dilutions of purified M. bovigenitalium ATCC 19852 gDNA
gDNA Concentration (ng/µl)	fm/ul	femtograms	log value	rep 1	rep 1	rep 1	Mean Ct	STD
1	1000000	5000000	6.69897	14.171	14.3373	13.8329	14.1137	0.257029
0.1	100000	500000	5.69897	17.4145	17.5056	17.5928	17.5043	0.0891163
0.01	10000	50000	4.69897	20.5975	19.9403	20.993	20.5103	0.531724
0.001	1000	5000	3.69897	24.1046	24.2943	24.074	24.1576	0.119341
0.0001	100	500	2.69897	27.3506	27.5833	27.5949	27.5096	0.137798
1e-05	10	50	1.69897	30.5426	30.9065	30.6958	30.715	0.182714
1e-06	1	5	0.69897	33.8959	34.2401	35.2577	34.4646	0.708112
Serial dilutions of purified M. californicum ATCC 33461 gDNA
gDNA Concentration (ng/µl)	fm/ul	femtograms	log value	rep 1	rep 1	rep 1	Mean Ct	STD
1	1000000	5000000	6.69897	16.7523	16.2566	16.7747	16.5945	0.292888
0.1	100000	500000	5.69897	18.3893	19.218	18.9566	18.8546	0.423656
0.01	10000	50000	4.69897	22.547	22.194	22.1771	22.306	0.208849
0.001	1000	5000	3.69897	27.6875	27.5263	27.5225	27.5788	0.0942037
0.0001	100	500	2.69897	29.1837	29.7681	29.7792	29.577	0.340632
1e-05	10	50	1.69897	32.1804	32.7356	32.2675	32.3945	0.298555
1e-06	1	5	0.69897	35.329	34.7165	36.8491	35.6316	1.09802
Serial dilutions of purified A. laidlawii ATCC 23206 gDNA
gDNA Concentration (ng/µl)	fm/ul	femtograms	log value	replicate 1 Ct	replicate 2 Ct	replicate 3 Ct	Mean Ct
1	1000000	5000000	6.69897	30.9649	31.0543	31.1421	31.0538
0.1	100000	500000	5.69897	33.4027	34.8482	33.2401	33.8303
0.01	10000	50000	4.69897	Undetermined	Undetermined	Undetermined
0.001	1000	5000	3.69897	Undetermined	Undetermined	Undetermined
0.0001	100	500	2.69897	Undetermined	Undetermined	Undetermined
1e-05	10	50	1.69897	Undetermined	Undetermined	Undetermined
1e-06	1	5	0.69897	Undetermined	Undetermined	Undetermined

## Sheet: Multiplex - rpoB
Multiplex qPCR assay
Senitivity of the primer/probe sets in detecting intended target species
rpoB
Serial dilutions of purified M. bovis ATCC 25523 gDNA
gDNA Concentration (ng/µl)	fm/ul	femtograms	log value	rep 1	rep 1	rep 1	Mean Ct	STD
1	1000000	5000000	6.69897	15.2997	15.0815	15.1049	15.1621	0.119794
0.1	100000	500000	5.69897	18.6289	18.9168	18.7333	18.7597	0.14575
0.01	10000	50000	4.69897	22.0214	22.3903	22.0891	22.167	0.196393
0.001	1000	5000	3.69897	25.6162	25.9003	25.8816	25.7994	0.158903
0.0001	100	500	2.69897	29.286	29.069	29.5302	29.295	0.230763
1e-05	10	50	1.69897	32.6097	32.9308	32.9884	32.843	0.204071
1e-06	1	5	0.69897	36.4741	35.0587	34.7333	35.422	0.925498
Serial dilutions of purified M. bovigenitalium ATCC 19852 gDNA
gDNA Concentration (ng/µl)	fm/ul	femtograms	log value	rep 1	rep 1	rep 1	Mean Ct
1	1000000	5000000	6.69897	31.8082	31.6317	31.648	31.696
0.1	100000	500000	5.69897	35.0497	34.9321	34.9933	34.9917
0.01	10000	50000	4.69897	Undetermined	Undetermined	Undetermined
0.001	1000	5000	3.69897	Undetermined	Undetermined	Undetermined
0.0001	100	500	2.69897	Undetermined	Undetermined	Undetermined
1e-05	10	50	1.69897	Undetermined	Undetermined	Undetermined
1e-06	1	5	0.69897	Undetermined	Undetermined	Undetermined
Serial dilutions of purified M. californicum ATCC 33461 gDNA
gDNA Concentration (ng/µl)	fm/ul	femtograms	log value	rep 1	rep 1	rep 1	Mean Ct
1	1000000	5000000	6.69897	33.4118	32.9223	33.1226	33.1522
0.1	100000	500000	5.69897	35.588	35.7123	37.1534	36.1512
0.01	10000	50000	4.69897	Undetermined	Undetermined	Undetermined
0.001	1000	5000	3.69897	Undetermined	Undetermined	Undetermined
0.0001	100	500	2.69897	Undetermined	Undetermined	Undetermined
1e-05	10	50	1.69897	Undetermined	Undetermined	Undetermined
1e-06	1	5	0.69897	Undetermined	Undetermined	Undetermined
Serial dilutions of purified A. laidlawii ATCC 23206 gDNA
gDNA Concentration (ng/µl)	fm/ul	femtograms	log value	rep 1	rep 1	rep 1	Mean Ct
1	1000000	5000000	6.69897	Undetermined	Undetermined	Undetermined
0.1	100000	500000	5.69897	Undetermined	Undetermined	Undetermined
0.01	10000	50000	4.69897	Undetermined	Undetermined	Undetermined
0.001	1000	5000	3.69897	Undetermined	Undetermined	Undetermined
0.0001	100	500	2.69897	Undetermined	Undetermined	Undetermined
1e-05	10	50	1.69897	Undetermined	Undetermined	Undetermined
1e-06	1	5	0.69897	Undetermined	Undetermined	Undetermined

## Sheet: Multiplex - ITS
Multiplex qPCR assay
Senitivity of the primer/probe sets in detecting intended target species
16S-23S ITS
Serial dilutions of purified A. laidlawii ATCC 23206 gDNA
gDNA Concentration (ng/µl)	fm/ul	femtograms	log value	rep 1	rep 1	rep 1	Mean Ct
1	1000000	5000000	6.69897	12.826	13.099	13.1638	13.0296
0.1	100000	500000	5.69897	16.3004	16.6982	16.5095	16.5027
0.01	10000	50000	4.69897	19.9137	20.1277	20.0829	20.0414
0.001	1000	5000	3.69897	23.749	23.9161	23.8327	23.8326
0.0001	100	500	2.69897	27.0814	27.4944	27.3633	27.3131
1e-05	10	50	1.69897	30.7606	30.9014	30.9049	30.8556
1e-06	1	5	0.69897	34.25	33.7881	34.5106	34.1829
Serial dilutions of purified M. bovis ATCC 25523 gDNA
gDNA Concentration (ng/µl)	fm/ul	femtograms	log value	rep 1	rep 1	rep 1	Mean Ct
1				Undetermined	Undetermined	Undetermined
0.1				Undetermined	Undetermined	Undetermined
0.01				Undetermined	Undetermined	Undetermined
0.001				Undetermined	Undetermined	Undetermined
0.0001				Undetermined	Undetermined	Undetermined
1e-05				Undetermined	Undetermined	Undetermined
Serial dilutions of purified M. bovigenitalium ATCC 19852 gDNA
gDNA Concentration (ng/µl)	fm/ul	femtograms	log value	rep 1	rep 1	rep 1	Mean Ct
1				Undetermined	Undetermined	Undetermined
0.1				Undetermined	Undetermined	Undetermined
0.01				Undetermined	Undetermined	Undetermined
0.001				Undetermined	Undetermined	Undetermined
0.0001				Undetermined	Undetermined	Undetermined
1e-05				Undetermined	Undetermined	Undetermined
Serial dilutions of purified M. californicum ATCC 33461 gDNA
gDNA Concentration (ng/µl)	fm/ul	femtograms	log value	rep 1	rep 1	rep 1	Mean Ct
1				Undetermined	Undetermined	Undetermined
0.1				Undetermined	Undetermined	Undetermined
0.01				Undetermined	Undetermined	Undetermined
0.001				Undetermined	Undetermined	Undetermined
0.0001				Undetermined	Undetermined	Undetermined
1e-05				Undetermined	Undetermined	Undetermined

## Sheet: LOD for M. bovis
Limit of Detection for Mulitplex Assay
M.bovis ATCC 25523 spiked in milk samples
16S rRNA
CFU/mL	Log(CFU/ML)	replicate 1 Ct	replicate 2 Ct	average	Mean* Ct	STDV*
25000000	7.39794	15.0219	15.067	15.0445	15.0426	0.00259962
25000000		15.0948	14.9868	15.0408
2500000	6.39794	17.9425	17.8133	17.8779	17.6863	0.233398
2500000		17.4304	17.5592	17.4948
250000	5.39794	20.0698	20.2136	20.1417	20.4134	0.319424
250000		20.699	20.6713	20.6852
25000	4.39794	24.4762	24.4385	24.4574	24.3282	0.149917
25000		24.2017	24.1965	24.1991
2500	3.39794	28.6711	28.8515	28.7613	28.8259	0.104944
2500		28.8964	28.8845	28.8905
250	2.39794	30.9998	31.4961	31.2479	31.4164	0.286524
250		31.6541	31.5157	31.5849
25	1.39794	34.9796	33.8952	34.4374	33.6118	1.06628
25		32.5668	33.0054	32.7861
Negative Control**		34.4729	34.0778	34.2753	35.0851	0.949376
Negative Control		35.857	35.9328	35.8949
rpoB
CFU/mL	Log(CFU/ML)	replicate 1 Ct	replicate 2 Ct	average	Mean* Ct	STDV*
25000000	7.39794	15.2852	15.4117	15.3484	15.3104	0.053779
25000000		15.3626	15.1822	15.2724
2500000	6.39794	19.3916	19.1419	19.2668	19.2947	0.039531
2500000		19.3426	19.3027	19.3227
250000	5.39794	21.4391	21.4265	21.4328	21.5858	0.216306
250000		21.7615	21.7159	21.7387
25000	4.39794	25.4976	25.3247	25.4112	25.6411	0.325228
25000		25.8678	25.8744	25.8711
2500	3.39794	29.9681	29.7347	29.8514	29.7441	0.151712
2500		29.7155	29.5582	29.6369
250	2.39794	32.5294	32.3407	32.435	32.3529	0.11618
250		32.5514	31.9901	32.2707
25	1.39794	34.5898	35.2978	34.9438	35.9672	1.44724
25		34.4763	39.5047	36.9905
Negative Control		35.8274	36.0355	35.9314	37.175	1.75875
Negative Control		40	36.8373	38.4187
16S-23S ITS
CFU/mL	Log(CFU/ML)	replicate 1 Ct	replicate 2 Ct	average	Mean* Ct	STDV*
25000000	7.39794	36.1409	36.4156	36.2782	37.5989	1.86766
25000000		37.839	40	38.9195
2500000	6.39794	40	37.5763	38.7881	37.8563	1.31782
2500000		37.6674	36.1815	36.9244
250000	5.39794	36.3549	34.1305	35.2427	35.6711	0.605819
250000		35.2654	36.9335	36.0995
25000	4.39794	40	34.9307	37.4654	37.2592	0.291604
25000		36.701	37.405	37.053
2500	3.39794	35.2018	35.356	35.2789	34.3335	1.33698
2500		33.7163	33.0599	33.3881
250	2.39794	36.3703	34.8477	35.609	35.4486	0.226795
250		37.1921	33.3844	35.2883
25	1.39794	36.6711	33.2548	34.963	34.8372	0.177856
25		34.8497	34.5732	34.7114
Negative Control		36.0021	35.6113	35.8067	36.1976	0.552779
Negative Control		38.8237	34.3532	36.5884
*The data are the means of all replicates for the given dilution
**The sample reprsents non-spiked milk sample
*** Ct values are too high to be detected by qPCR assay

## Sheet: LOD for M. californicum
Limit of Detection for Mulitplex Assay
M. californicum ATCC 33461 spiked in milk samples
16S rRNA
CFU/ML	Log(CFU/ML)	Rep1	Rep2	average
230000	5.36173	20.6567	20.7043	20.6805
23000	4.36173	21.917	22.0185	21.9678
2300	3.36173	26.6356	26.7047	26.6701
230	2.36173	29.4525	29.6683	29.5604
23	1.36173	32.7695	32.7998	32.7846
Negative Control**		33.3337	33.3379	33.3358
rpoB gene target
CFU/ML	Log(CFU/ML)	Rep1	Rep2	average
230000	5.36173	36.3732	36.3043	36.3388
23000	4.36173	40	40	40
2300	3.36173	40	40	40
230	2.36173	37.1477	35.0141	36.0809
23	1.36173	38.1632	35.5302	36.8467
Negative Control		37.6022	36.7156	37.1589
16S-23S ITS gene target
CFU/ML	Log(CFU/ML)	Rep1	Rep2	average
230000	5.36173	40	40	40
23000	4.36173	35.9553	40	37.9777
2300	3.36173	40	36.5847	38.2923
230	2.36173	36.5765	36.902	36.7393
23	1.36173	36.7029	40	38.3514
Negative Control		36.7517	36.4223	36.587
*The data are the means of all replicates for the given dilution
**The sample reprsents non-spiked milk sample
*** Ct values are too high to be detected by qPCR assay

## Sheet: LOD for A. laidlawii
Limit of Detection
A. laidlawii ATCC 23206 spiked in milk samples
16S rRNA
Cell numbers (CFU/mL)	Log(CFU/ML)	replicate 1 Ct	replicate 2 Ct	average	Mean* Ct	STDV*	16S
12200000	7.08636	31.5488	32.4812	32.015	32.1166	0.143678
12200000		32.1998	32.2365	32.2182
1220000	6.08636	32.0845	32.2519	32.1682	32.5334	0.516502
1220000		33.1664	32.6309	32.8987
122000	5.08636	30.3374	32.4602	31.3988	32.134	1.03969
122000		32.6145	33.1238	32.8691
12200	4.08636	32.2591	32.3709	32.315	32.5198	0.289633
12200		32.2537	33.1954	32.7246
1220	3.08636	31.7519	32.0801	31.916	32.3703	0.642388
1220		32.8229	32.826	32.8245
122	2.08636	32.559	31.8487	32.2039	32.6344	0.608908
122		33.15	32.98	33.065
Negative Control**		34.1169	33.3529	33.7349
Negative Control		33.2964	33.5479	33.4222
rpoB
Cell numbers (CFU/mL)	Log(CFU/ML)	replicate 1 Ct	replicate 2 Ct	average	Mean* Ct	STDV*
12200000	7.08636	40	39.4248	39.7124	39.5224	0.26867
12200000		38.6649	40	39.3324
1220000	6.08636	40	40	40	38.1189	2.66034
1220000		37.121	35.3544	36.2377
122000	5.08636	34.7336	35.9429	35.3383	37.6691	3.29633
122000		40	40	40
12200	4.08636	39.8732	40	39.9366	39.3121	0.883128
12200		37.3753	40	38.6877
1220	3.08636	40	37.5765	38.7882	38.4667	0.454737
1220		40	36.2903	38.1452
122	2.08636	35.2575	35.7451	35.5013	35.8114	0.438516
122		35.787	36.456	36.1215
Negative Control		36.8602	36.9563	36.9082	36.622	0.404765
Negative Control		36.3127	36.3589	36.3358
16S-23S ITS
Cell numbers (CFU/mL)	Log(CFU/ML)	replicate 1 Ct	replicate 2 Ct	average	average* Ct	STDV*	16S-ITS
12200000	7.08636	14.2565	14.3002	14.2784	14.4523	0.246045
		14.6599	14.5927	14.6263
1220000	6.08636	17.7537	17.7777	17.7657	17.9706	0.289728
		18.1215	18.2294	18.1754
122000	5.08636	21.0003	21.0682	21.0342	21.3235	0.40905
		21.6793	21.5461	21.6127
12200	4.08636	24.1633	24.1418	24.1525	24.4074	0.360428
		24.7032	24.6213	24.6623
1220	3.08636	28.1693	28.1072	28.1383	28.0111	0.179885
		27.9496	27.8181	27.8839
122	2.08636	31.3235	31.1253	31.2244	31.2359	0.0163439
		31.165	31.33	31.2475
Negative Control		36.7765	35.8306	36.3035	36.2342	0.098045
Negative Control		36.7517	35.578	36.1649
*The data are the means of all replicates for the given dilution
**The sample reprsents non-spiked milk sample
*** Ct values are too high to be detected by qPCR assay

## Sheet: Multispecies infection
qPCR assay performance in case of multispecies infection
Sample Name		Gene Target	Rep1	Rep2	Rep3	Mean* Ct	STDV*
M. bovis (high)	A. laidlawii (high)	16S rRNA	16.8434	16.9153	16.9364	16.8984	0.0487392
M. bovis (high)	A. laidlawii (intermediate)	16S rRNA	16.5211	16.533	16.8427	16.6323	0.182343
M. bovis (high)	A. laidlawii (low)	16S rRNA	16.5495	16.6579	16.8373	16.6816	0.145386
M. bovis (high)	A. laidlawii (high)	rpoB	16.7313	16.5396	16.4656	16.5788	0.137142
M. bovis (high)	A. laidlawii (intermediate)	rpoB	16.6806	16.2923	16.2987	16.4239	0.222367
M. bovis (high)	A. laidlawii (low)	rpoB	16.5995	16.2739	16.2543	16.3759	0.193921
M. bovis (high)	A. laidlawii (high)	16S-23S ITS	15.6371	15.6928	15.7341	15.688	0.048685
M. bovis (high)	A. laidlawii (intermediate)	16S-23S ITS	26.1453	26.0525	25.858	26.0186	0.146621
M. bovis (high)	A. laidlawii (low)	16S-23S ITS	35.9259	36.8316	37.3287	36.6954	0.711268
M. bovis (intermediate)	A. laidlawii (high)	16S rRNA	27.0892	27.1773	27.3981	27.2215	0.159123
M. bovis (intermediate)	A. laidlawii (intermediate)	16S rRNA	27.3242	27.3932	27.5554	27.4243	0.118686
M. bovis (intermediate)	A. laidlawii (low)	16S rRNA	27.3649	27.3869	27.5616	27.4378	0.107774
M. bovis (intermediate)	A. laidlawii (high)	rpoB	27.1503	26.5349	26.8044	26.8299	0.308453
M. bovis (intermediate)	A. laidlawii (intermediate)	rpoB	27.0698	26.9644	26.8761	26.9701	0.0969742
M. bovis (intermediate)	A. laidlawii (low)	rpoB	27.2952	26.9911	26.8519	27.0461	0.22671
M. bovis (intermediate)	A. laidlawii (high)	16S-23S ITS	15.8514	15.7378	15.7153	15.7682	0.0729709
M. bovis (intermediate)	A. laidlawii (intermediate)	16S-23S ITS	25.6331	25.7629	25.7328	25.7096	0.0679693
M. bovis (intermediate)	A. laidlawii (low)	16S-23S ITS	32.95	33.3379	32.3324	32.8734	0.507102
M. bovis (low)	A. laidlawii (high)	16S rRNA	32.9464	33.5687	33.7172	33.4107	0.408958
M. bovis (low)	A. laidlawii (intermediate)	16S rRNA	33.245	33.2592	33.465	33.323	0.123116
M. bovis (low)	A. laidlawii (low)	16S rRNA	33.1966	33.5414	33.6666	33.4682	0.243396
M. bovis (low)	A. laidlawii (high)	rpoB	33.2144	34.2425	33.0159	33.4909	0.658392
M. bovis (low)	A. laidlawii (intermediate)	rpoB	33.695	33.4173	33.2843	33.4655	0.209556
M. bovis (low)	A. laidlawii (low)	rpoB	33.6381	34.3787	33.3798	33.7989	0.518484
M. bovis (low)	A. laidlawii (high)	16S-23S ITS	15.8945	15.8072	15.6695	15.7904	0.113435
M. bovis (low)	A. laidlawii (intermediate)	16S-23S ITS	25.6513	25.5885	25.7241	25.6546	0.0678489
M. bovis (low)	A. laidlawii (low)	16S-23S ITS	33.092	32.4661	33.1591	32.9057	0.382183
Negative Control		16S rRNA	37.514
Negative Control		rpoB	Undetermined
Negative Control		16S-23S ITS	Undetermined
